# Supplementary material for: Temperature dependence of desolvation effects in hydrogen-bonded spin crossover complexes
Source: Royal Society of Chemistry journal article supplement (doi:10.1039/d0dt03986a), 2021-01-01
Supplement: d0dt03986a1.pdf [file d0dt03986a1.pdf]

## Supplementary Information

### Temperature dependence of desolvation effects in hydrogen-bonded spin crossover complexes

Verónica Jornet-Mollá, Carlos Giménez-Saiz, Bruno J. C. Vieira, João C. Waerenborgh and Francisco M. Romero\*

**Table S1** Summary of crystal data of **1** at 298 K and 120 K.

|                                                                   | <b>1</b> (298 K)                                                 | <b>1</b> (120 K)                                                 |
|-------------------------------------------------------------------|------------------------------------------------------------------|------------------------------------------------------------------|
| Formula                                                           | C <sub>28</sub> H <sub>26</sub> FeN <sub>10</sub> O <sub>4</sub> | C <sub>28</sub> H <sub>26</sub> FeN <sub>10</sub> O <sub>4</sub> |
| Formula weight                                                    | 622.44                                                           | 622.44                                                           |
| Crystal system                                                    | Monoclinic                                                       | Monoclinic                                                       |
| Space group                                                       | C2/c (No. 15)                                                    | C2/c (No. 15)                                                    |
| <i>a</i> / Å                                                      | 18.4520(2)                                                       | 18.3091(5)                                                       |
| <i>b</i> / Å                                                      | 20.1395(3)                                                       | 20.1160(4)                                                       |
| <i>c</i> / Å                                                      | 15.0697(2)                                                       | 14.9144(3)                                                       |
| $\alpha$ / °                                                      | -                                                                | -                                                                |
| $\beta$ / °                                                       | 94.2540(10)                                                      | 93.730(2)                                                        |
| $\gamma$ / °                                                      | -                                                                | -                                                                |
| <i>V</i> / Å <sup>3</sup>                                         | 5584.68(13)                                                      | 5481.4(2)                                                        |
| <i>Z</i>                                                          | 8                                                                | 8                                                                |
| <i>T</i> / K                                                      | 298.00(10)                                                       | 119.9(2)                                                         |
| <i>D</i> <sub>calcd</sub> / g·cm <sup>-3</sup>                    | 1.481                                                            | 1.508                                                            |
| $\lambda$ / Å                                                     | 0.71073                                                          | 0.71073                                                          |
| $\theta$ -range/ °                                                | 2.435-29.992                                                     | 3.012-29.792                                                     |
| No. of rflns collected                                            | 68072                                                            | 65272                                                            |
| No. of indep. rflns/ <i>R</i> <sub>int</sub>                      | 7758/ 0.0449                                                     | 7476/ 0.0739                                                     |
| Restraints/ parameters                                            | 174/ 498                                                         | 294/ 498                                                         |
| <i>R</i> 1/ <i>wR</i> 2 ( <i>I</i> > 2σ( <i>I</i> )) <sup>a</sup> | 0.0393/ 0.0888                                                   | 0.0541/ 0.1014                                                   |
| <i>R</i> 1/ <i>wR</i> 2 (all data) <sup>a</sup>                   | 0.0650/ 0.1029                                                   | 0.0747/ 0.1093                                                   |
| $\Delta\rho_{\max}$ and $\Delta\rho_{\min}$ / e·Å <sup>-3</sup>   | 0.276/ - 0.345                                                   | 0.501/ - 0.579                                                   |

<sup>a</sup> *R*1 =  $\Sigma (F_o - F_c) / \Sigma (F_o)$ ; *wR*2 =  $[\Sigma [w(F_o^2 - F_c^2)^2 / \Sigma [w(F_o^2)^2]]^{1/2}$ .

**Table S2** Fe–N bond distances of **1** at 298 K and 120 K.

|         | <b>1</b> (298 K) | <b>1</b> (120 K) |
|---------|------------------|------------------|
| Fe1–N2  | 2.1772(15)       | 2.058(2)         |
| Fe1–N3  | 2.111(2)         | 2.002(3)         |
| Fe1–N5  | 2.1849(15)       | 2.069(2)         |
| Fe1–N6  | 2.117(2)         | 2.006(3)         |
| Fe2–N8  | 1.9638(14)       | 1.9663(18)       |
| Fe2–N9  | 1.9154(13)       | 1.9161(19)       |
| Fe2–N10 | 1.9671(14)       | 1.9613(18)       |

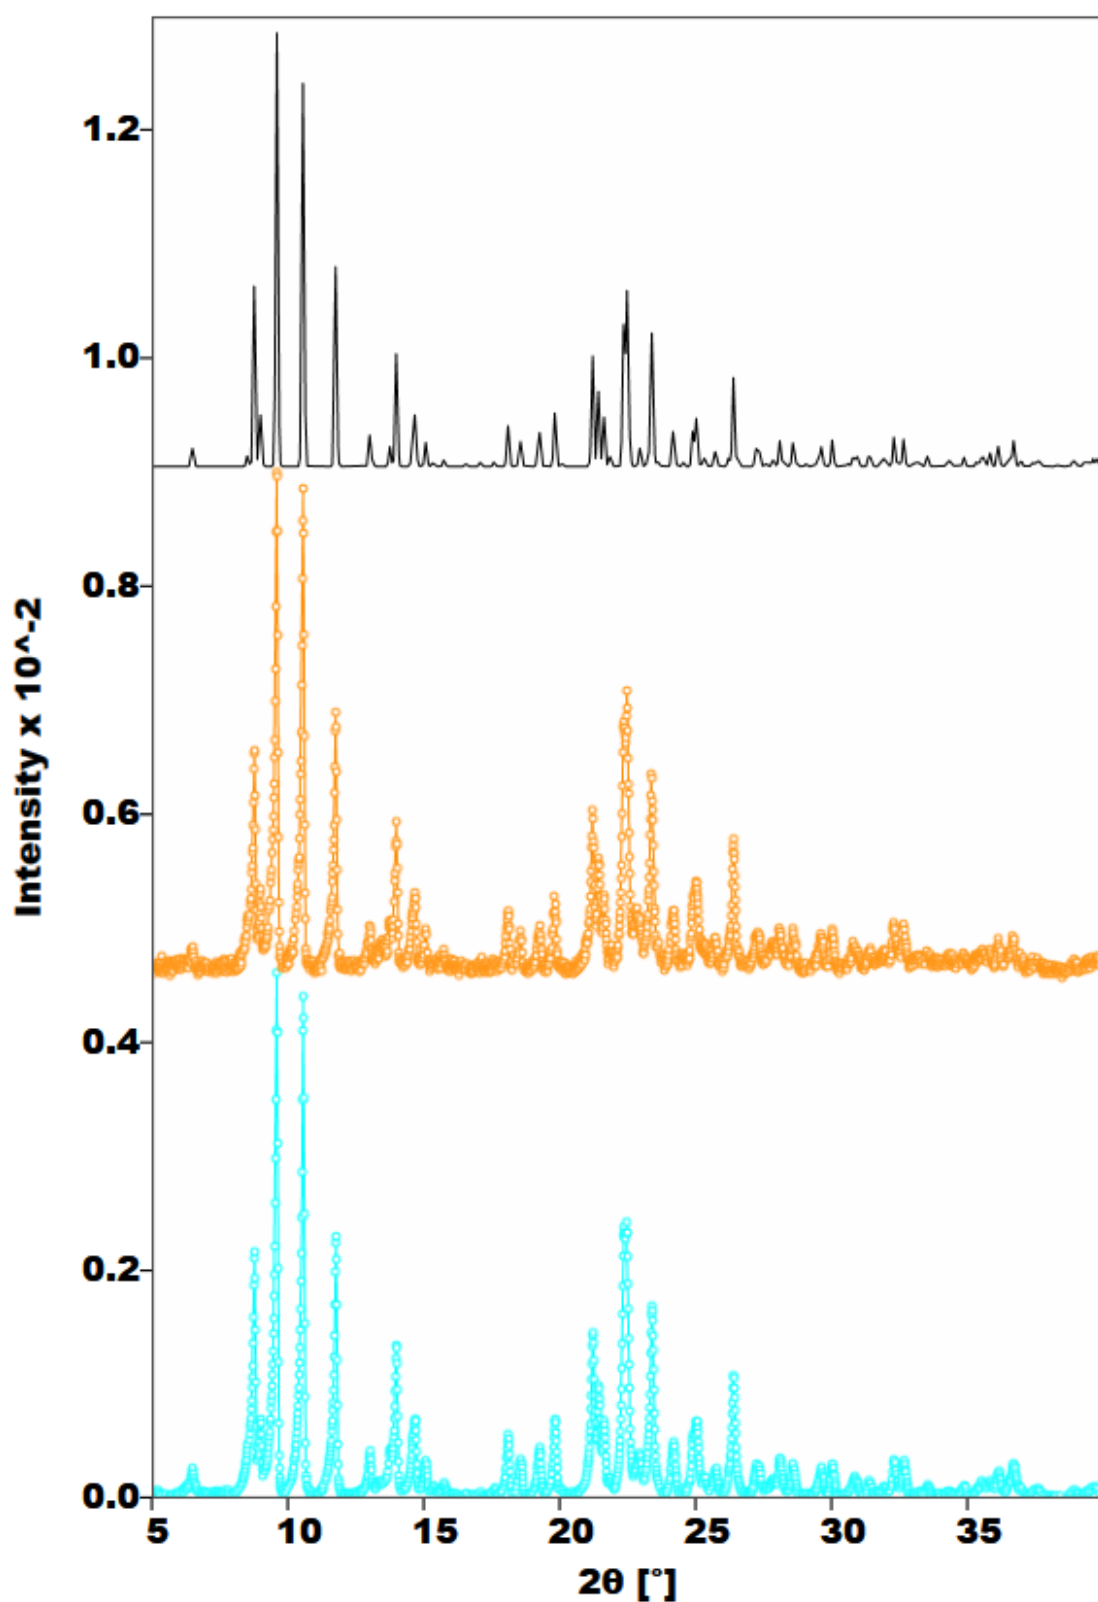

**Fig. S1.** Room temperature powder X-ray diffractogram of anhydrous **1** registered just after dehydration (orange), and after exposure to ambient humidity during 6 h (blue). The simulation obtained from single-crystal data at 298 K (black line) is shown for comparison.

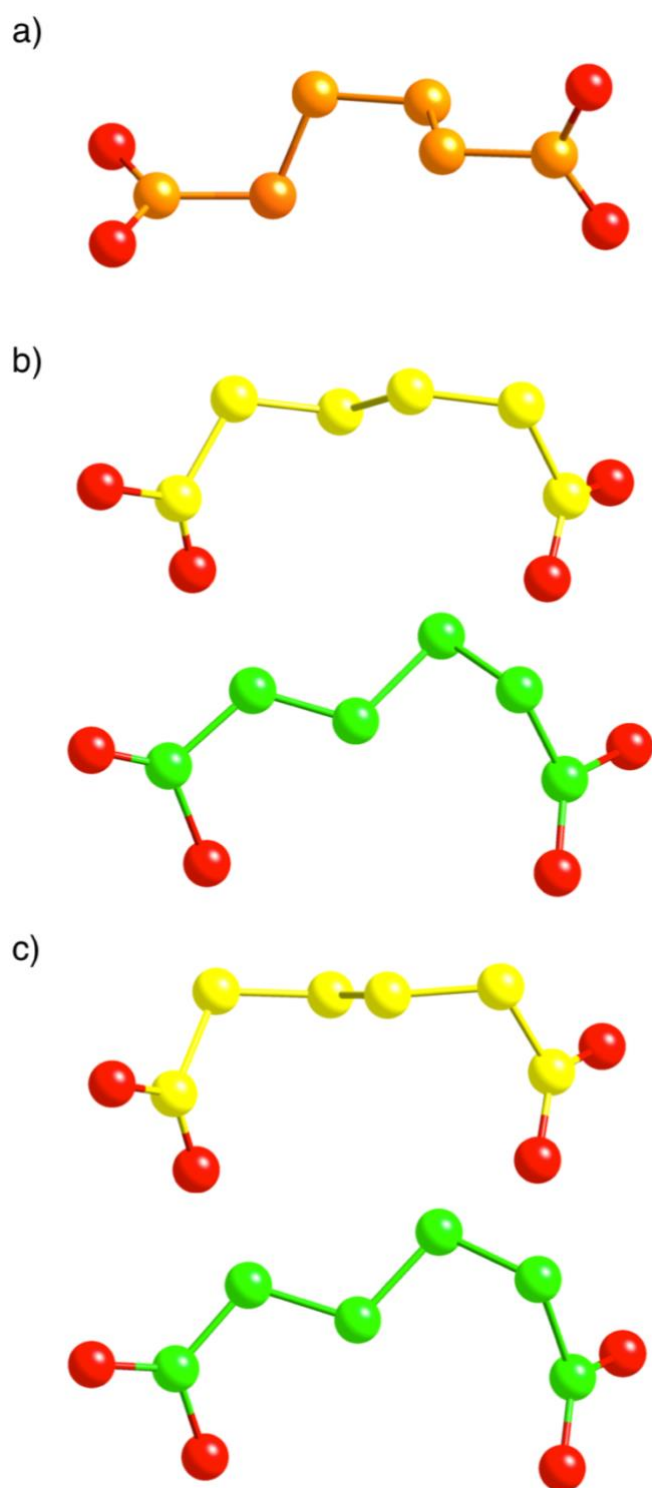

**Fig. S2.** View of the different adipate anions found in the X-ray crystal structures of  $1 \cdot 4\text{H}_2\text{O}$  (a) and **1** at 298 K (b) and 120 K (c). Yellow and green colours refer to adipates A and B, respectively.

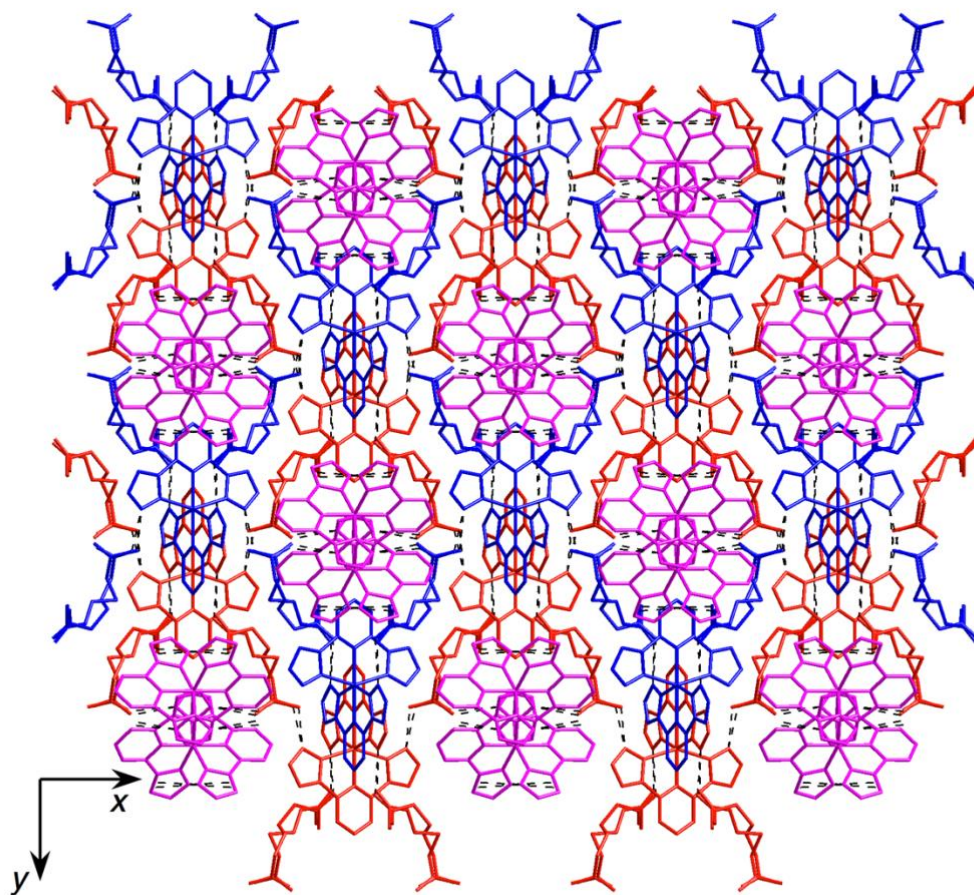

**Fig. S3.** View of the X-ray crystal structure of **1** at 298 K along the *c* axis. The plot shows two adjacent layers (red and blue coloured) of high-spin Fe1 sites connected by adipate anions. The void within these layers is occupied by stacks of Fe2 sites (depicted in magenta).

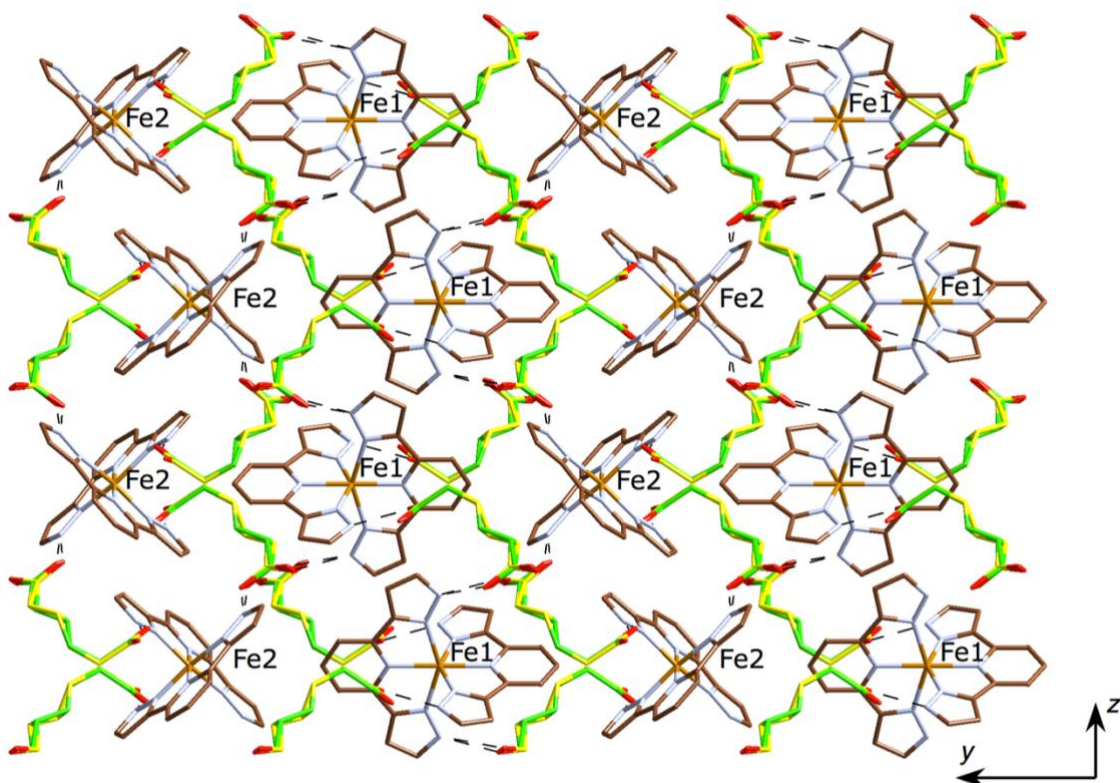

**Fig. S4.** Partial view of the X-ray crystal structure of **1** at 298 K showing the two crystallographically independent Fe sites forming separate stacks running along the *c* axis. Disordered adipate anions (in yellow and green) occupy the space between the stacks. Dashed lines refer to H bonds.

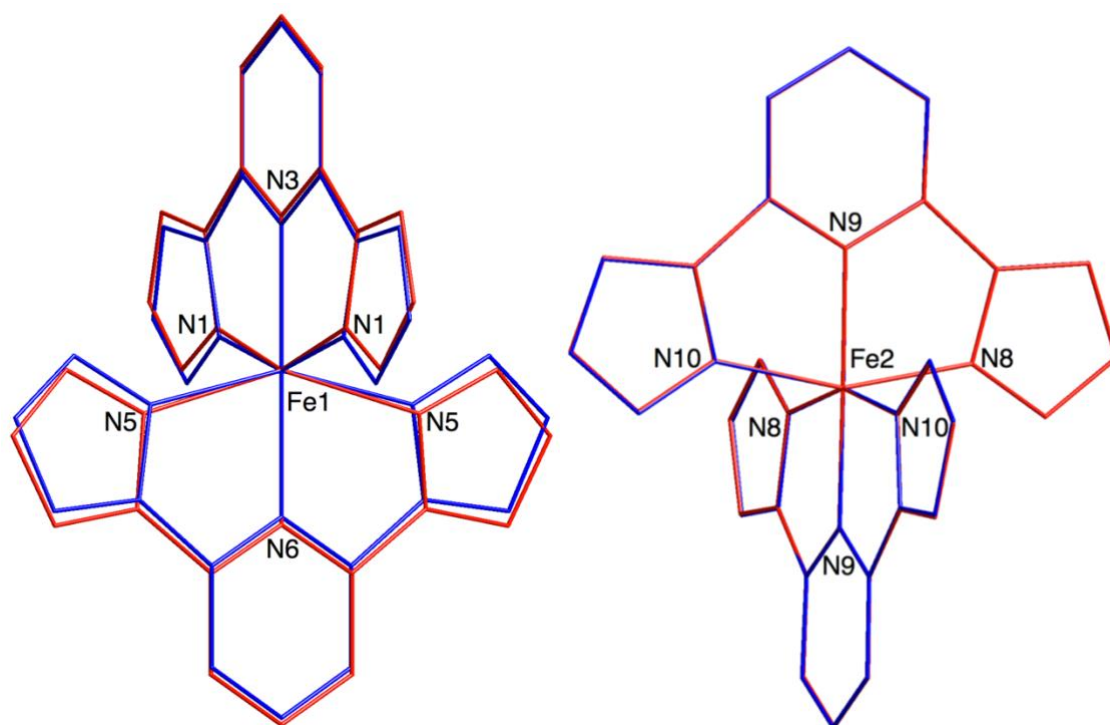

**Fig. S5.** Superposition of the X-ray crystal structures of **1** at 298 K (red sticks) and 120 K (blue sticks), showing the coordination environment of Fe1 (left) and Fe2 (right) sites.

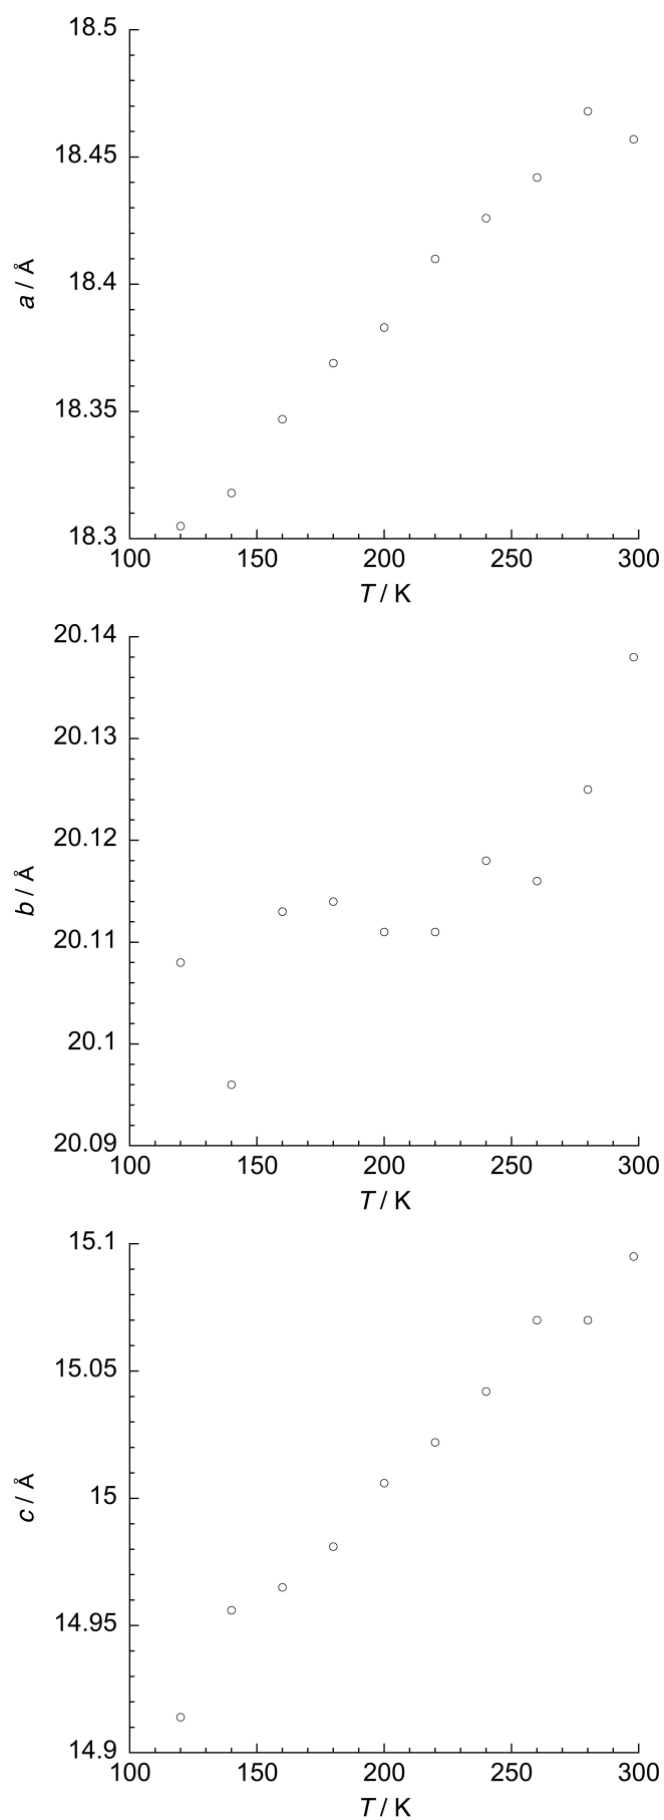

**Fig. S6.** Thermal dependence of unit cell parameters of **1**.



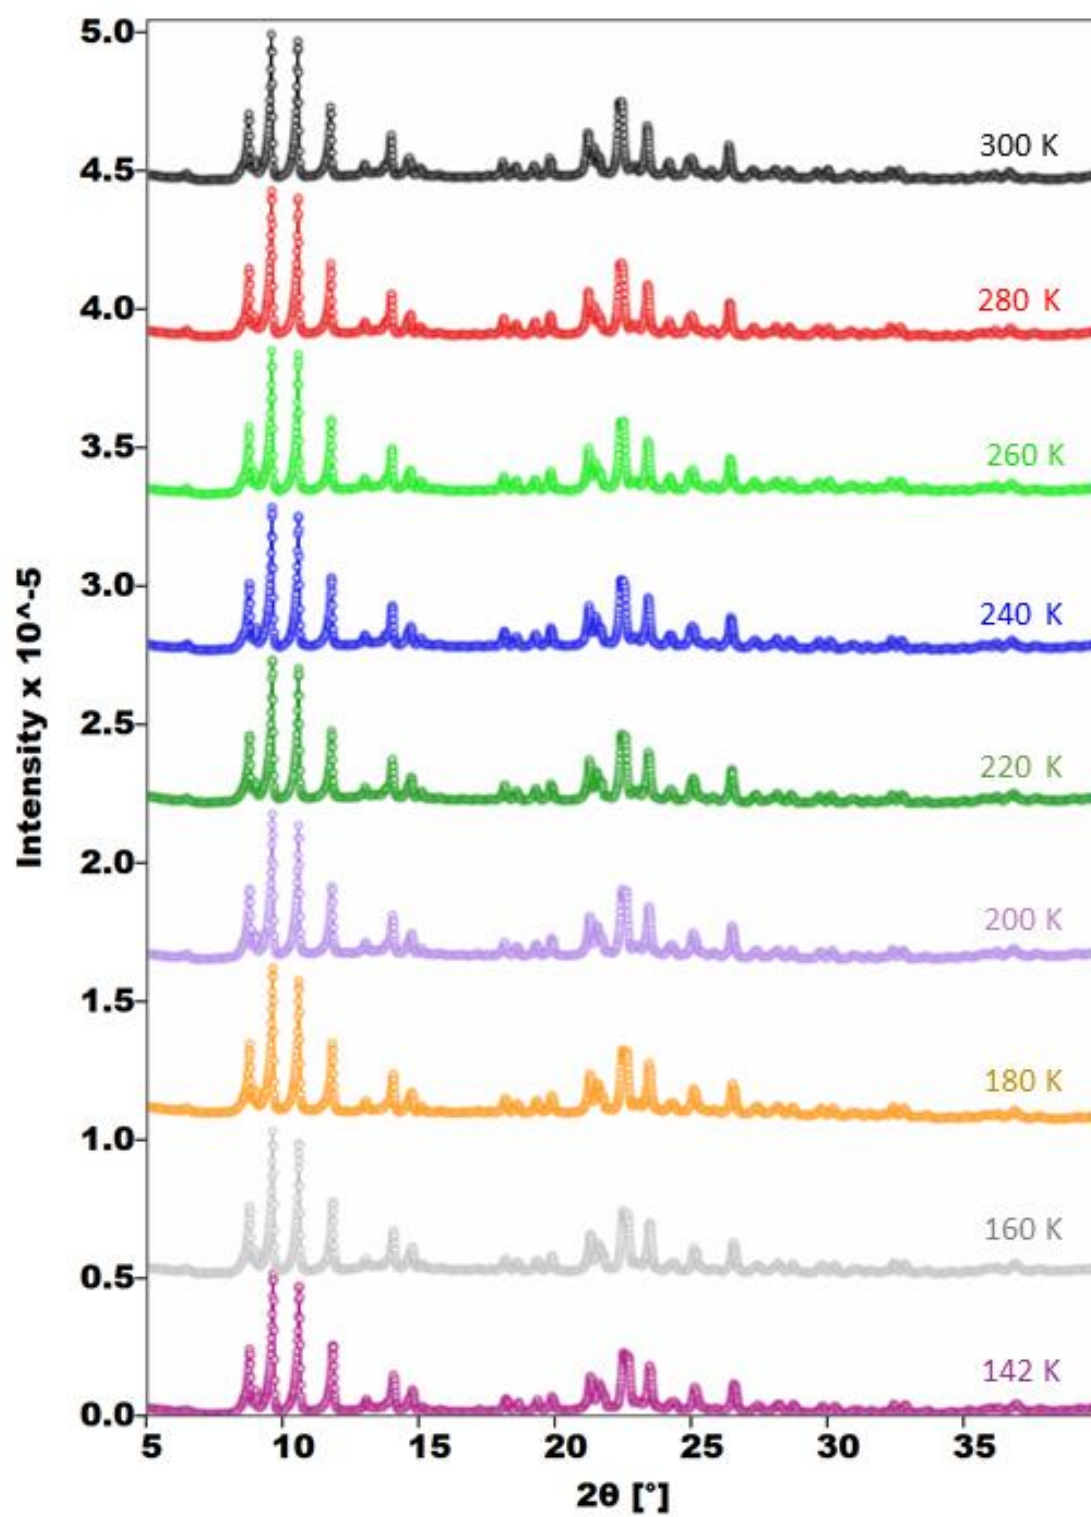

Fig. S7. Powder X-ray diffractograms of 1 at different temperatures.

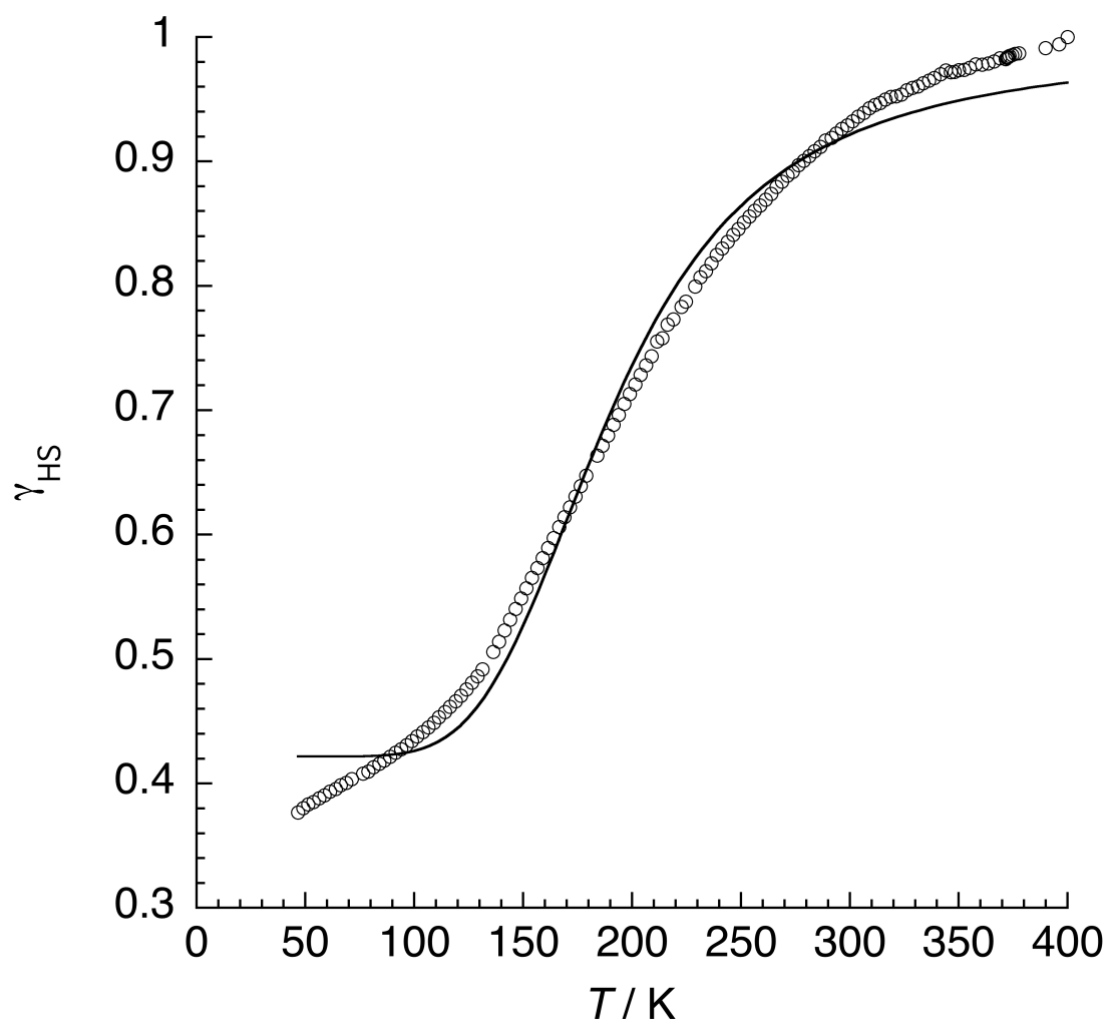

**Fig. S8.** Temperature dependence of the fraction of high-spin (HS) centers corresponding to the Fe1 site of compound **1**. The line corresponds to the best fit to a Boltzmann distribution with thermodynamic parameters  $\Delta H = 8.4 \pm 0.2$   $\text{kJ}\cdot\text{mol}^{-1}$  and  $\Delta S = 30 \pm 1$   $\text{J}\cdot\text{K}^{-1}\cdot\text{mol}^{-1}$ . The residual fraction of Fe1 HS centers present at low temperatures is  $\gamma_{\text{res}} = 0.42$ .

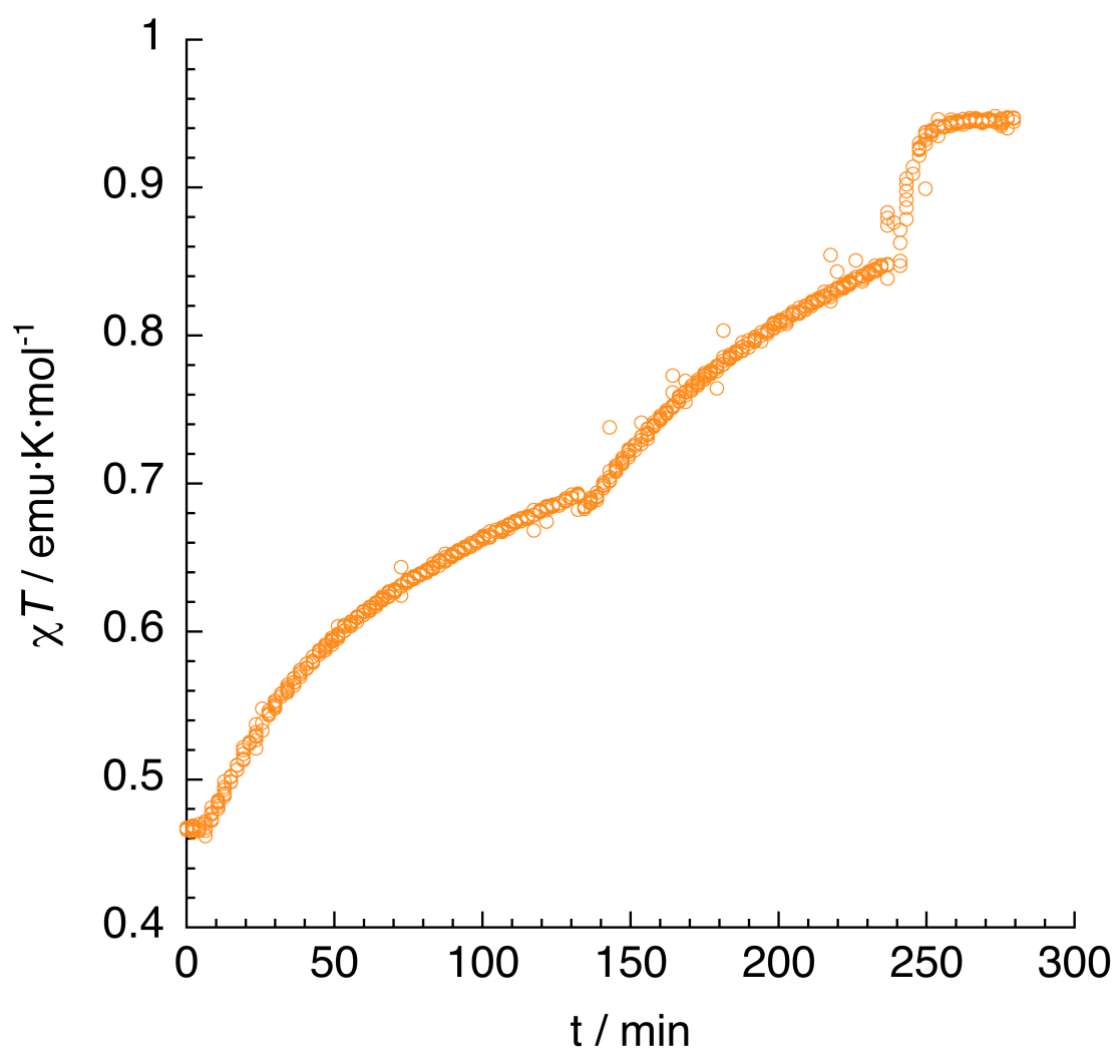

**Fig. S9.** Time dependence of the  $\chi T$  product of compound **1** during irradiation ( $\lambda = 532$  nm) at 10 K.
